# Supplementary material for: Multilocus variable-number tandem-repeat analysis of clinical isolates of Aspergillus flavus from Iran reveals the first cases of Aspergillus minisclerotigenes associated with human infection
Source: PubMed Central journal article supplement (PMC4099206; doi:10.1186/1471-2334-14-358), 2014-07-01
Supplement: 1471-2334-14-358-S2.pdf [file 1471-2334-14-358-S2.pdf]

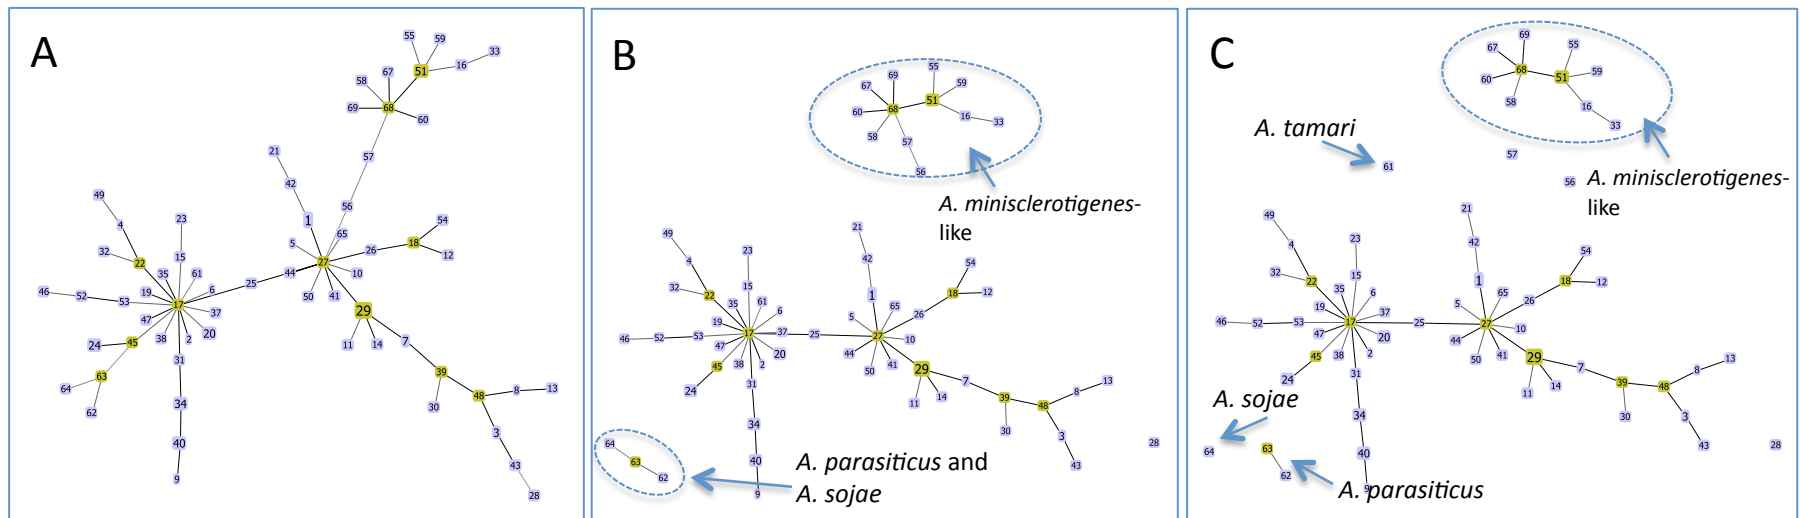

Figure S2
